# Supplementary material for: Implementation of 360-Degree Feedback in Telekom Malaysia
Source: eLife journal article supplement (doi:10.7554/elife.85898), 2011-01-01

# CAMA-1

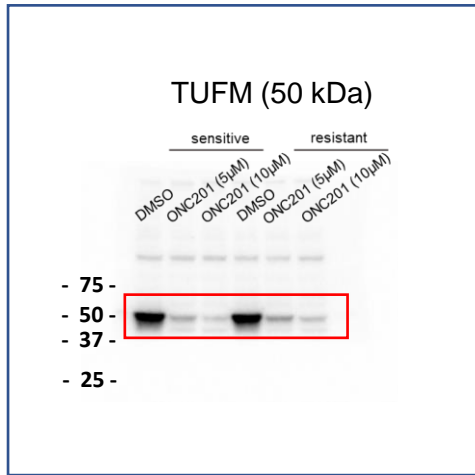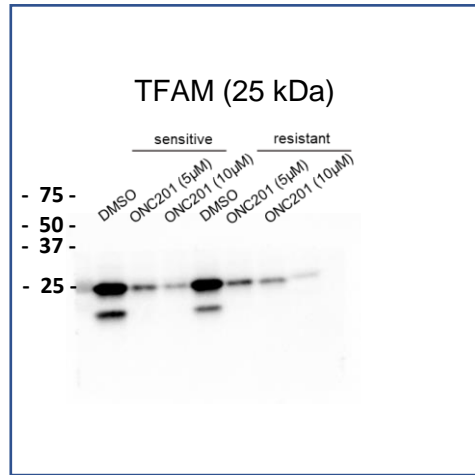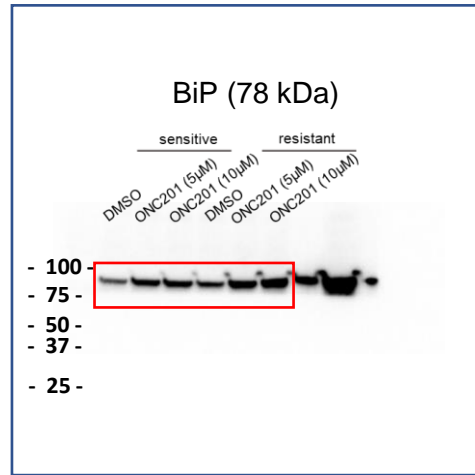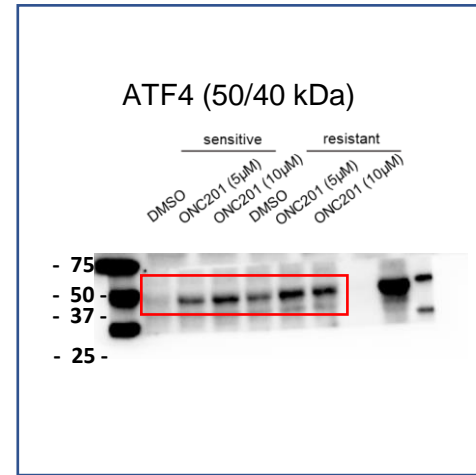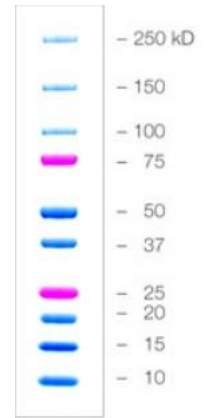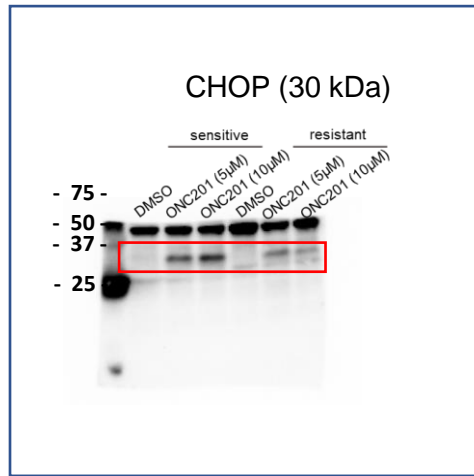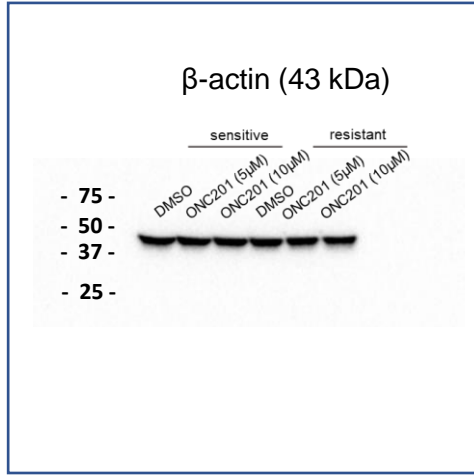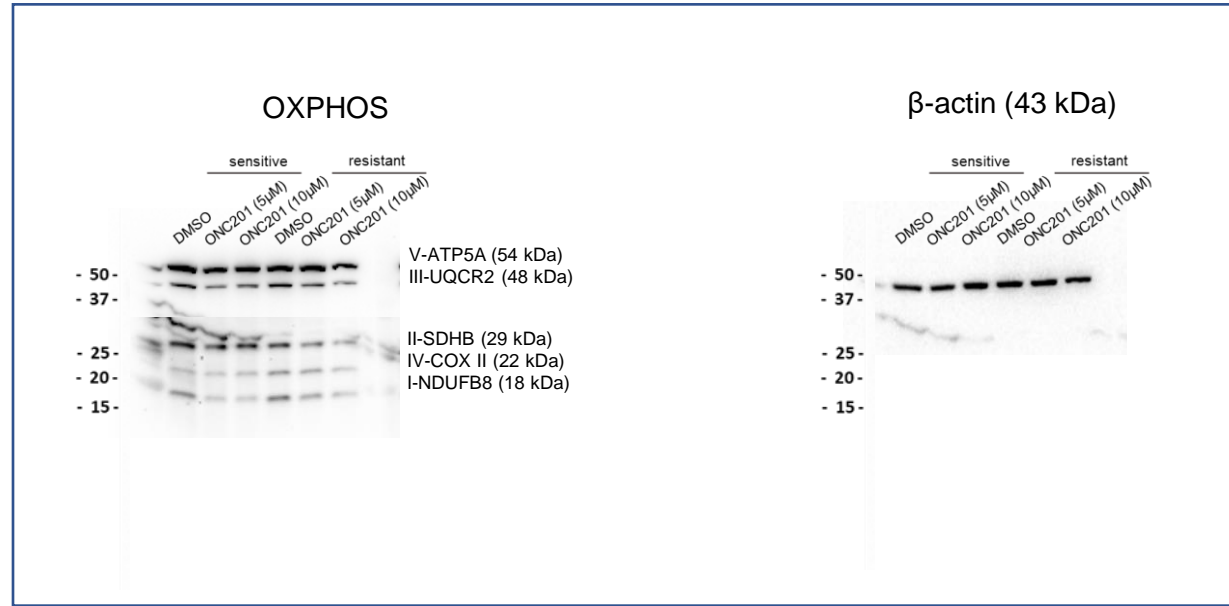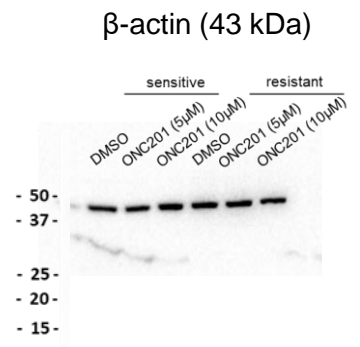

# MCF7

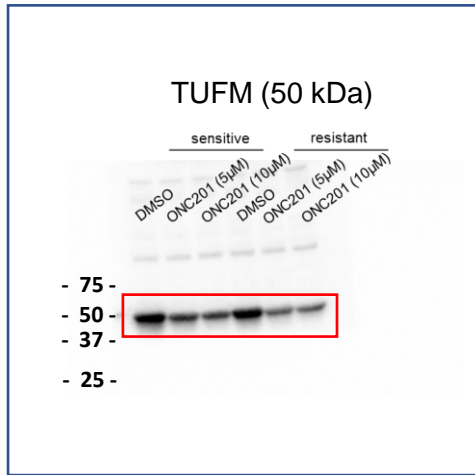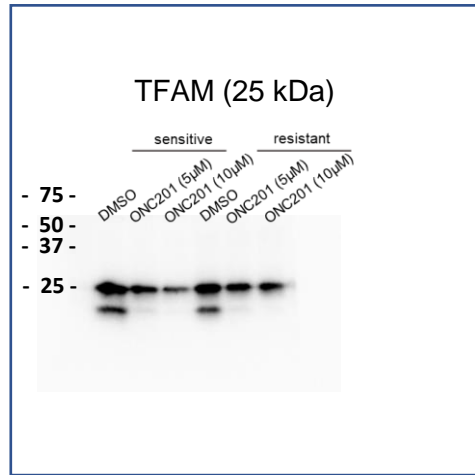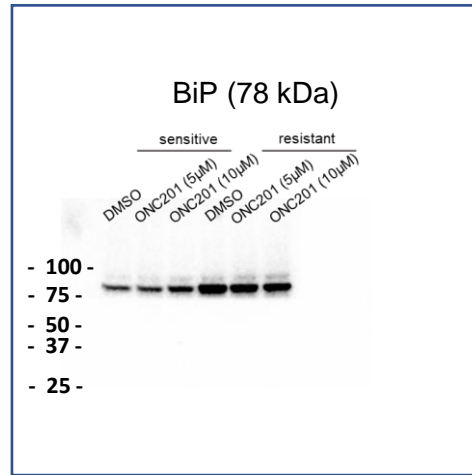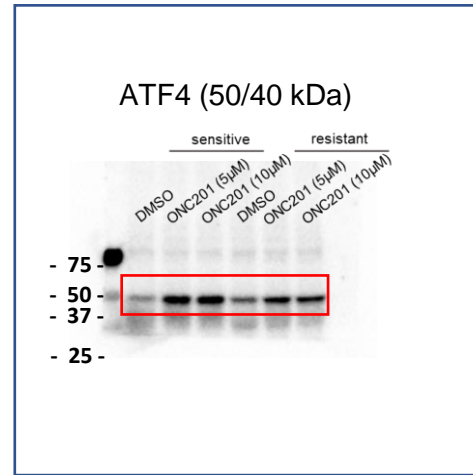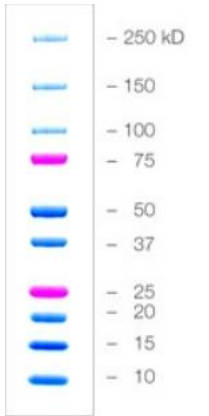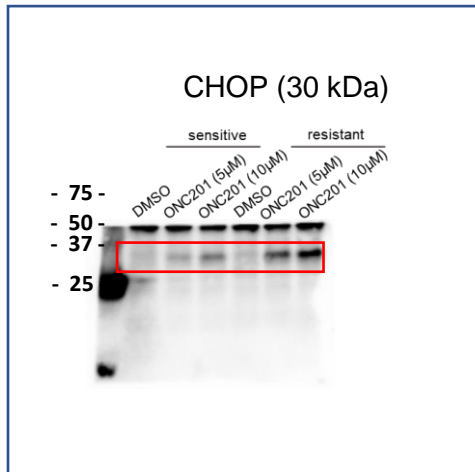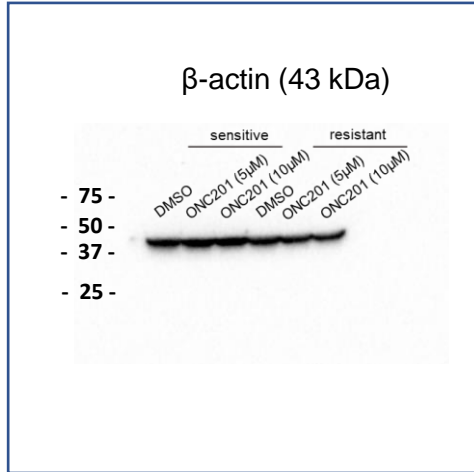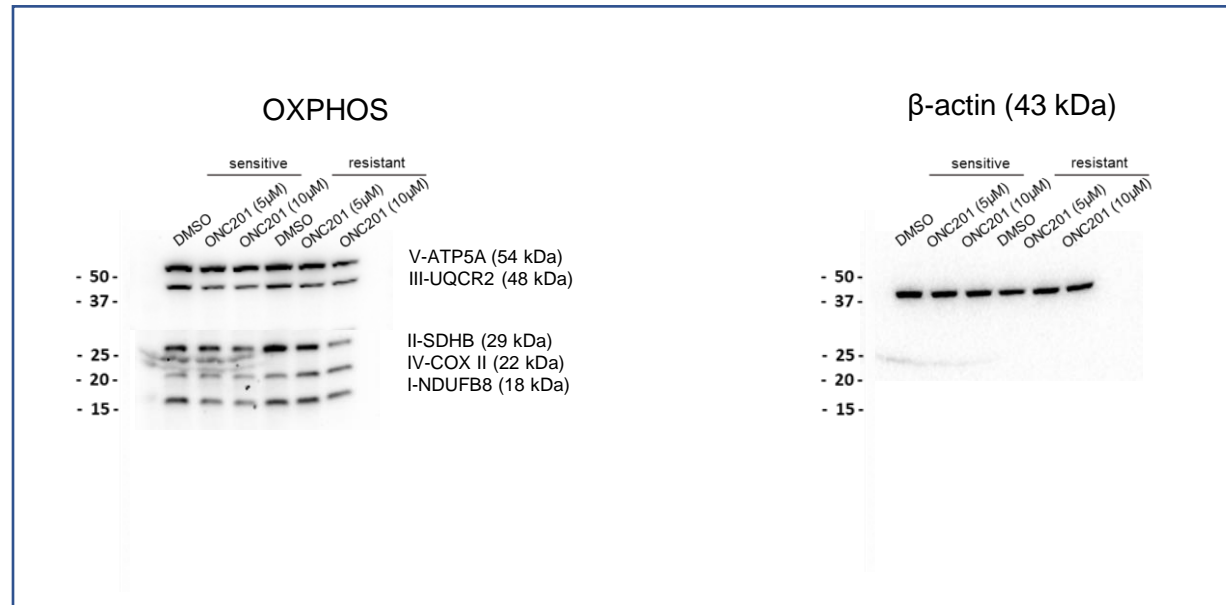

# T47D

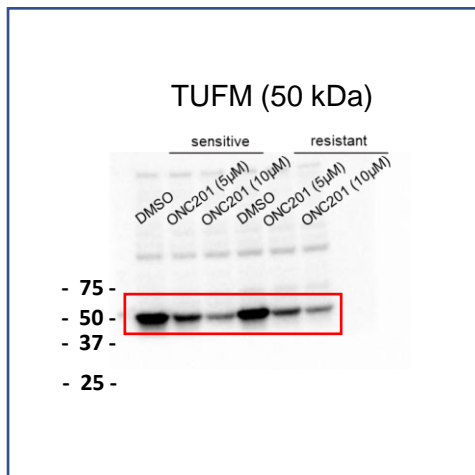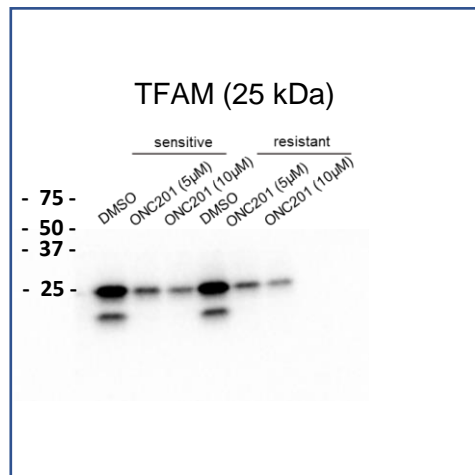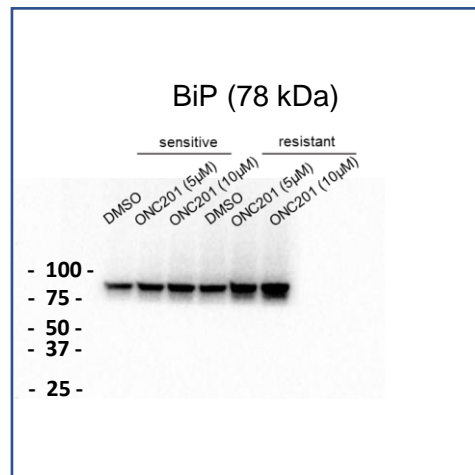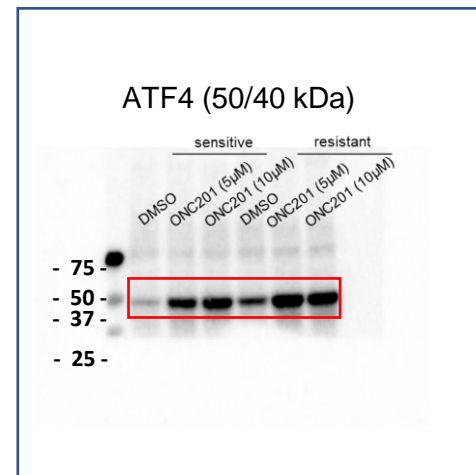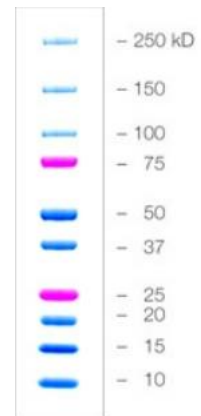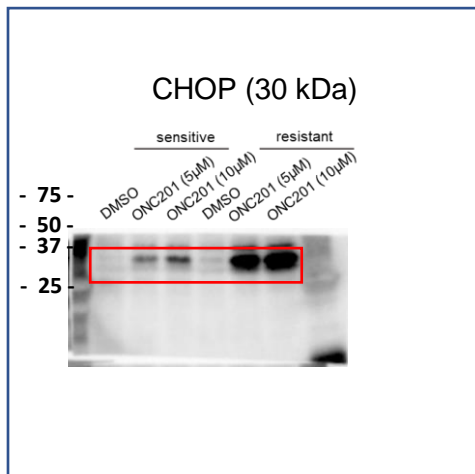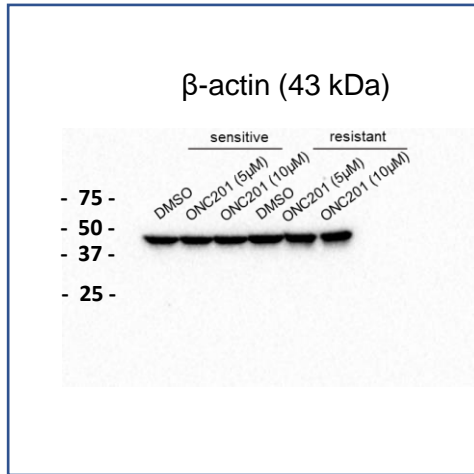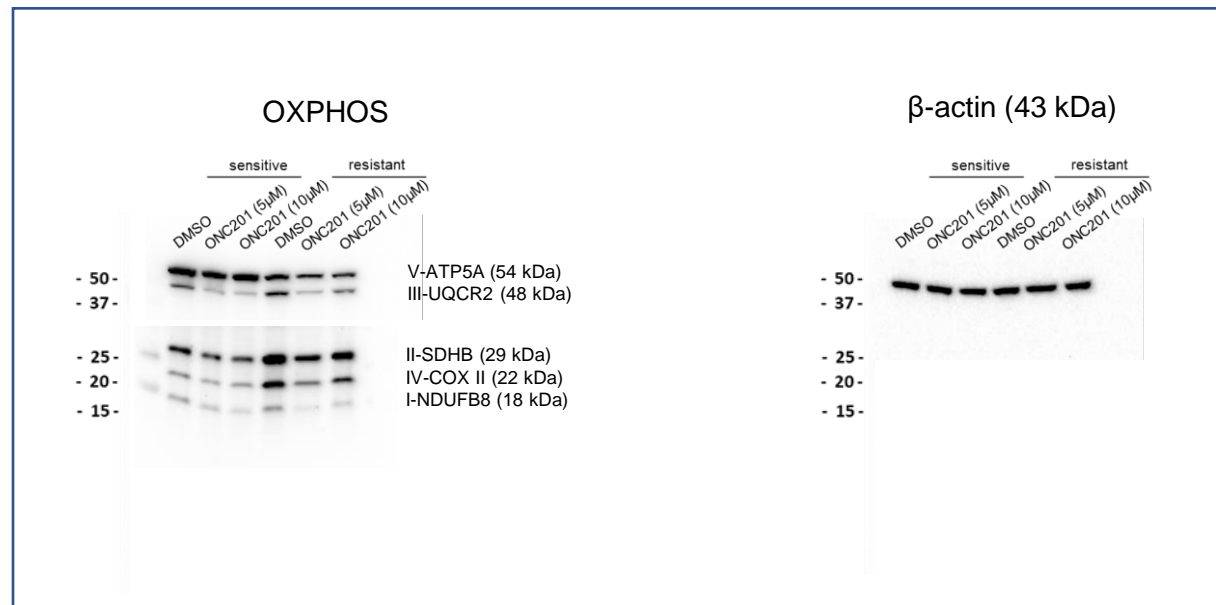

# CAMA-1

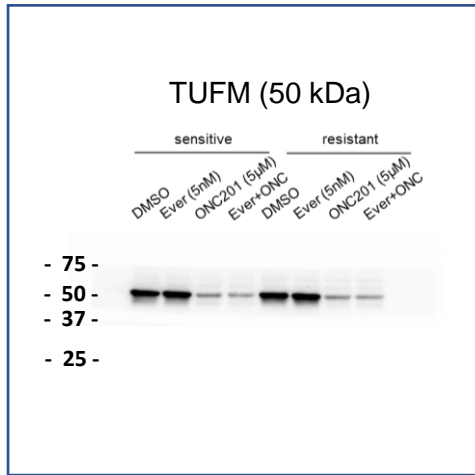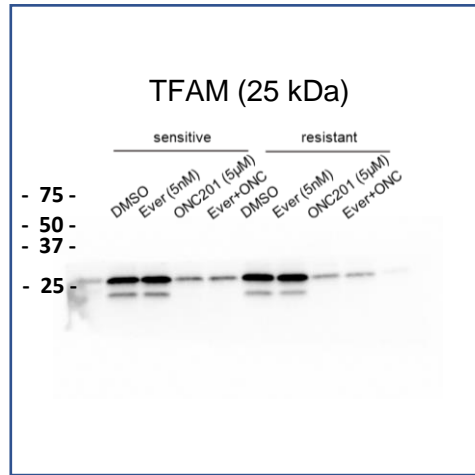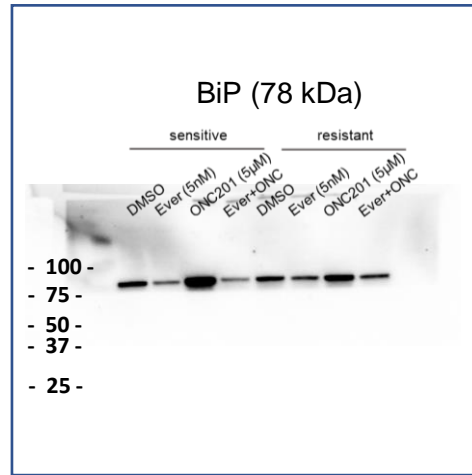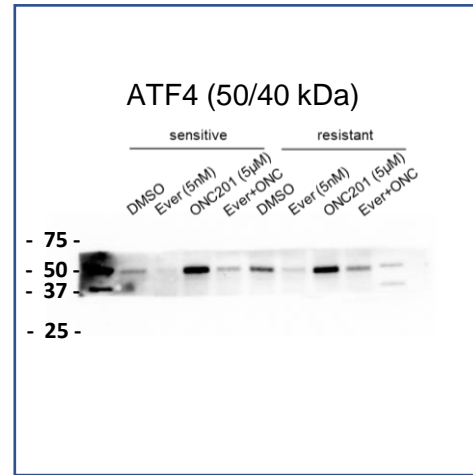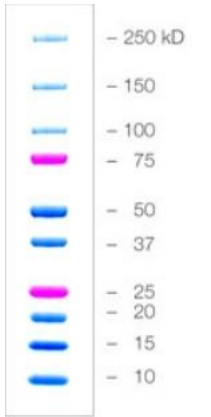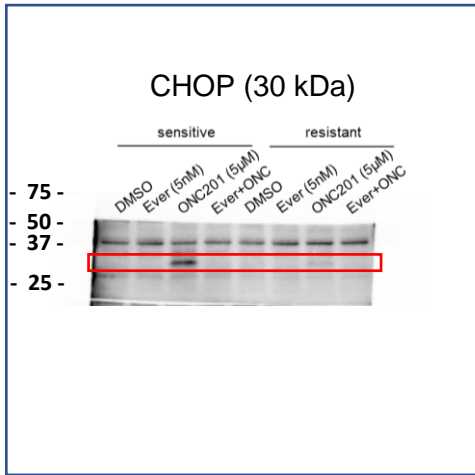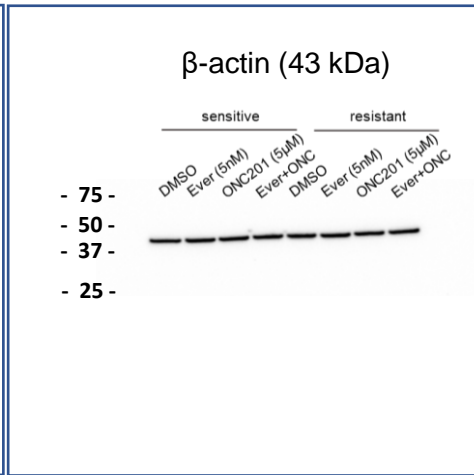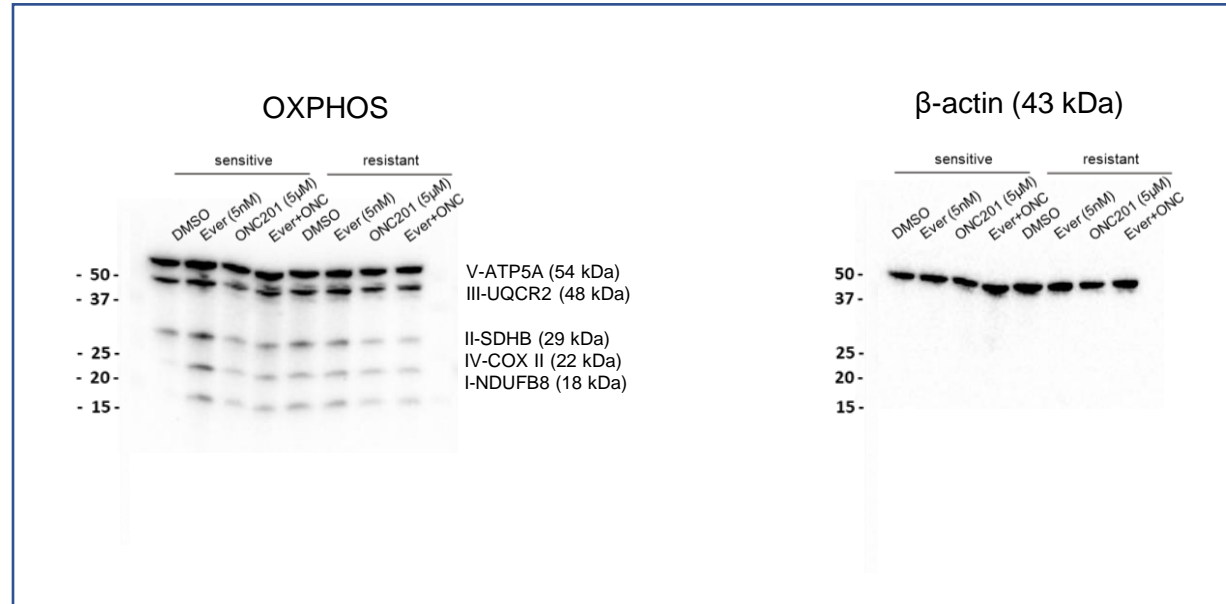

# MCF7

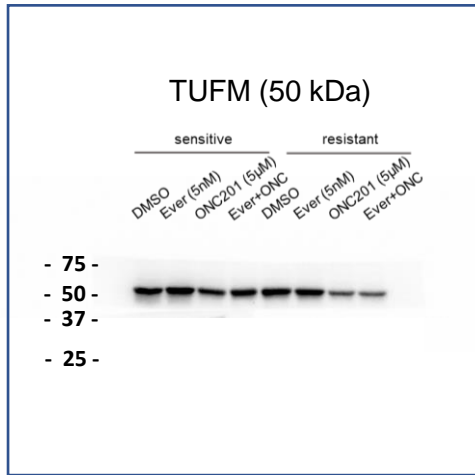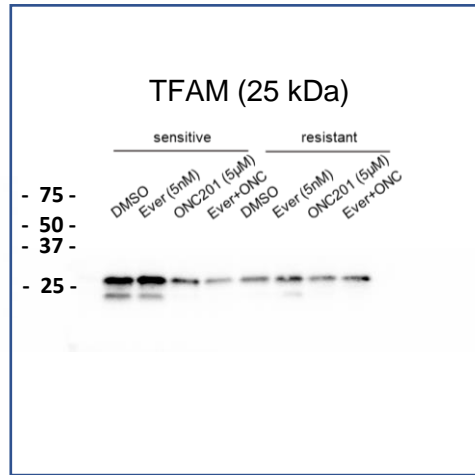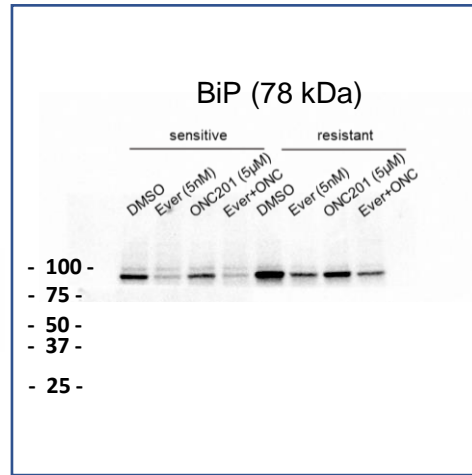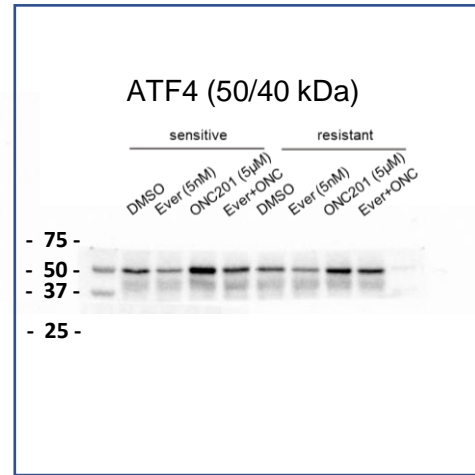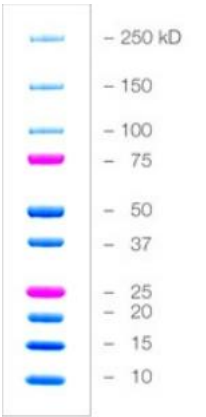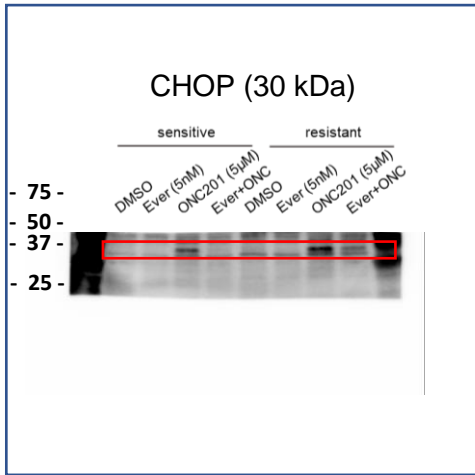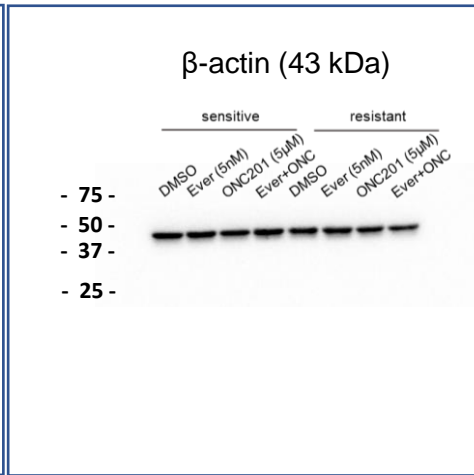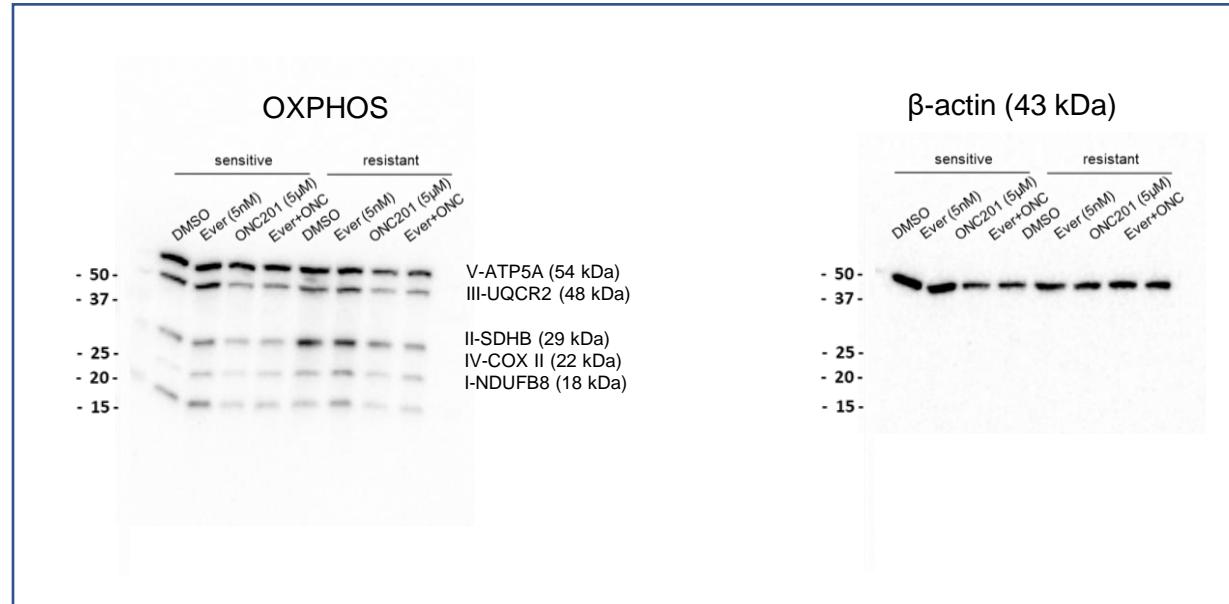

# T47D

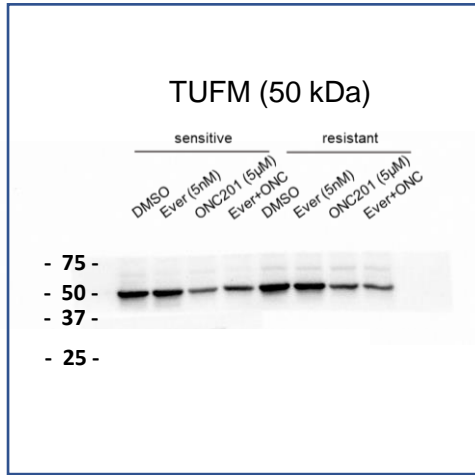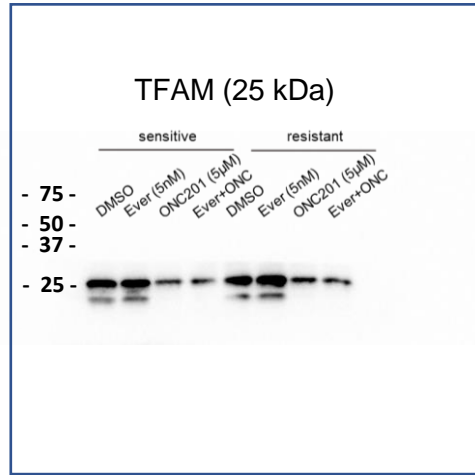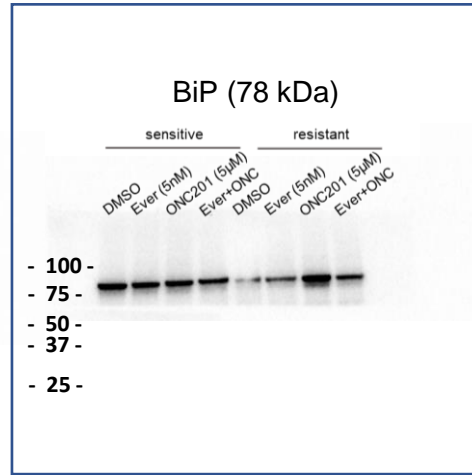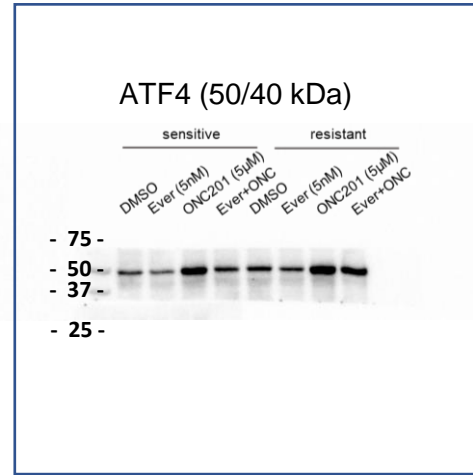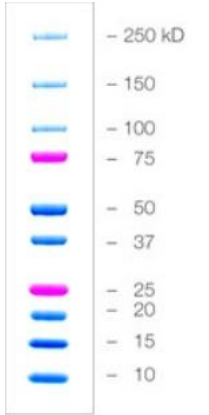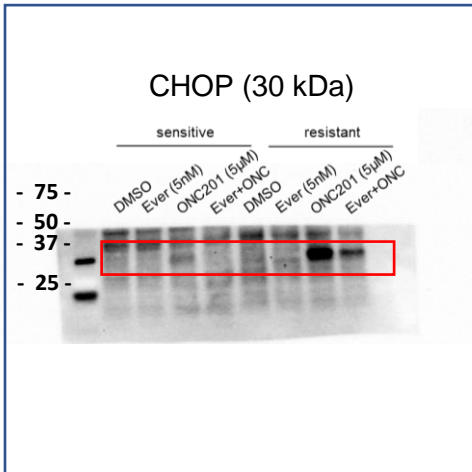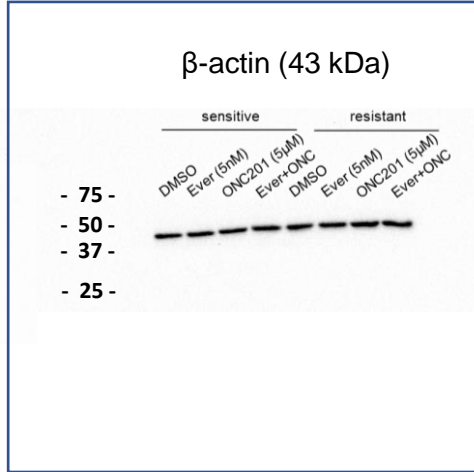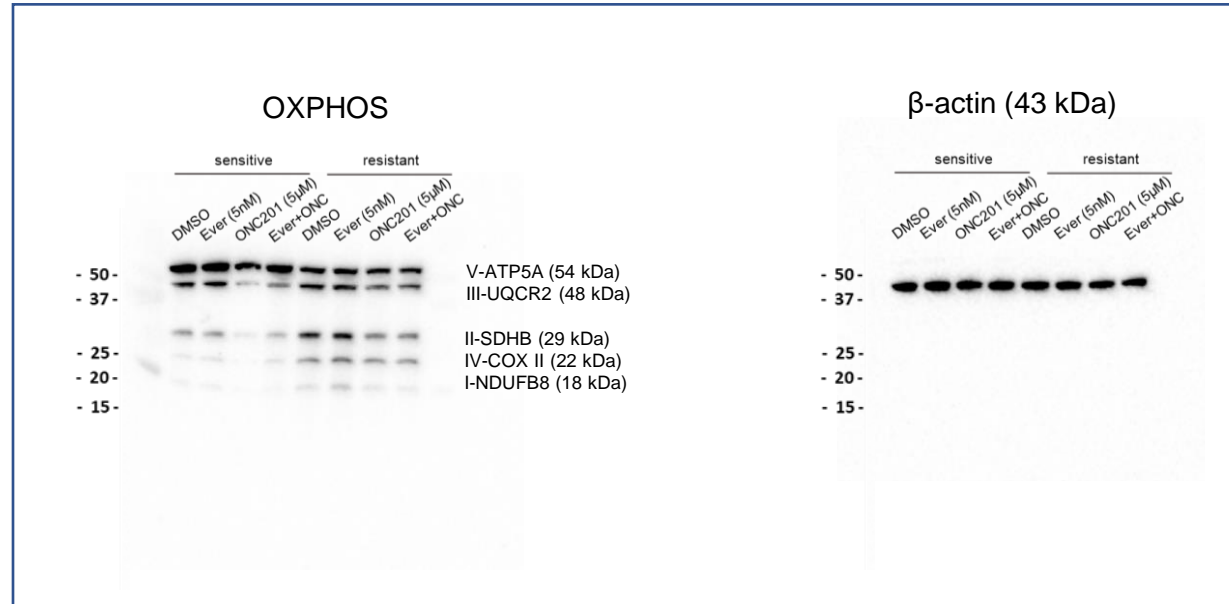

Supplement: fig4-data3 [file elife-85898-fig4-data3-v1.pdf]
