# Supplementary material for: Implementation of 360-Degree Feedback in Telekom Malaysia
Source: eLife journal article supplement (doi:10.7554/elife.85898), 2011-01-01

# CAMA-1

pAKT (60 kDa)

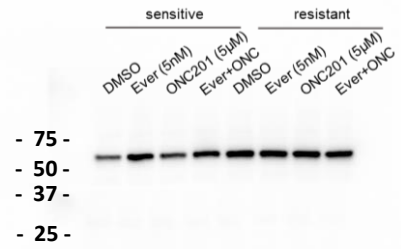

AKT (60 kDa)

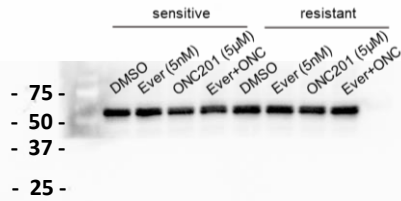

pERK (44/42 kDa)

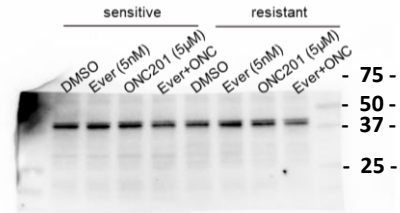

ERK (44/42 kDa)

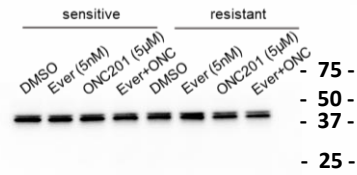

pFoxO3a (97 kDa)

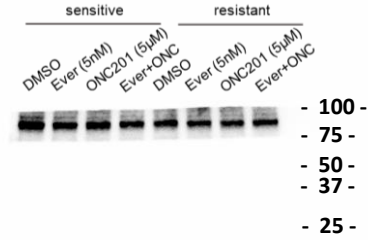

FoxO3a (97 kDa)

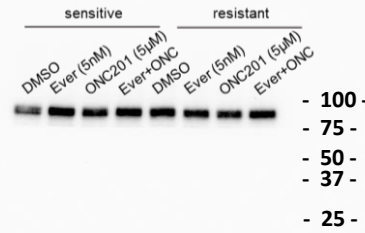

pS6 (32 kDa)

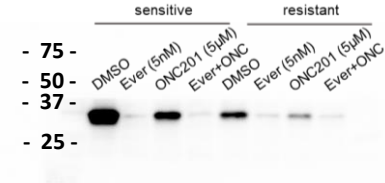

S6 (32 kDa)

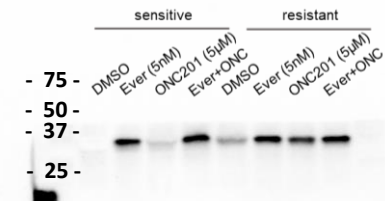

TRAIL (30 kDa)

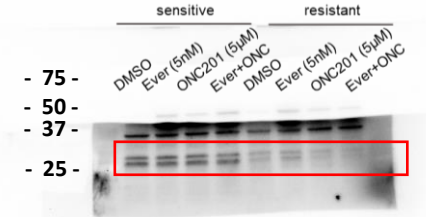

β-actin (43 kDa)

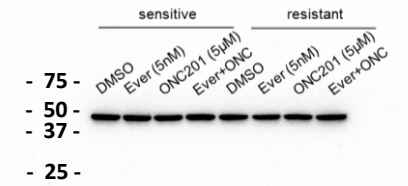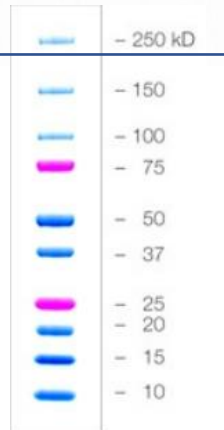

# MCF7

pAKT (60 kDa)

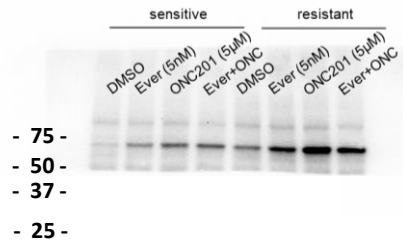

AKT (60 kDa)

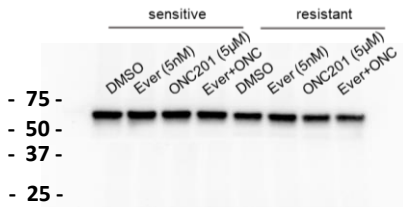

pERK (44/42 kDa)

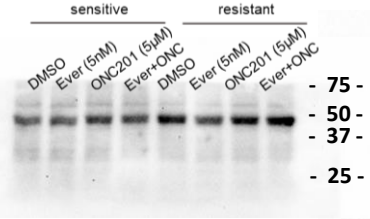

ERK (44/42 kDa)

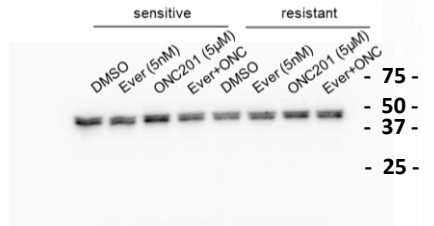

pFoxO3a (97 kDa)

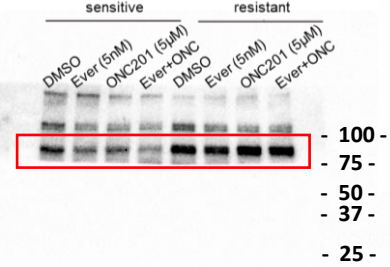

FoxO3a (97 kDa)

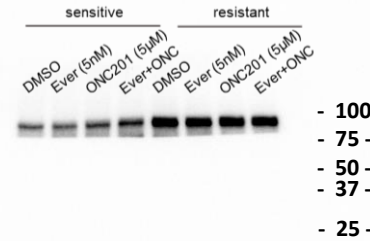

pS6 (32 kDa)

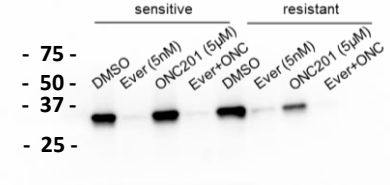

S6 (32 kDa)

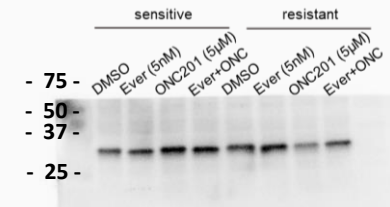

TRAIL (30 kDa)

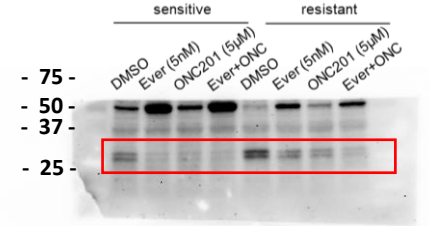

β-actin (43 kDa)

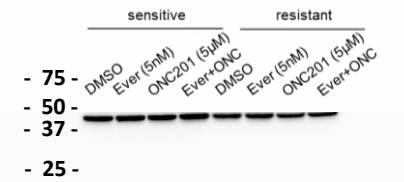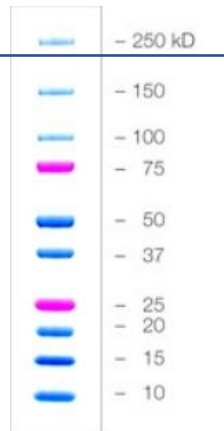

# T47D

pAKT (60 kDa)

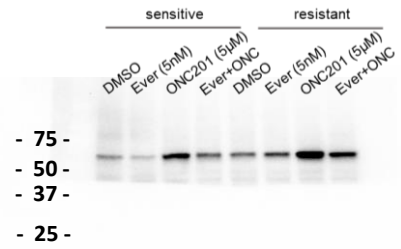

AKT (60 kDa)

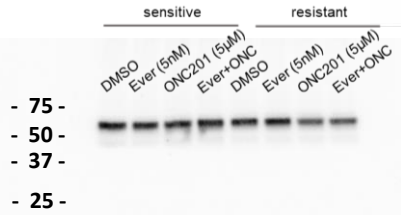

pERK (44/42 kDa)

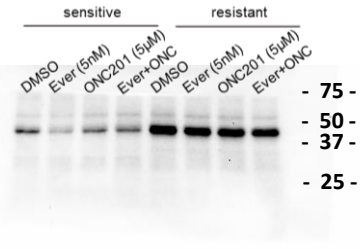

ERK (44/42 kDa)

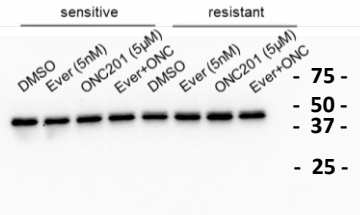

pFoxO3a (97 kDa)

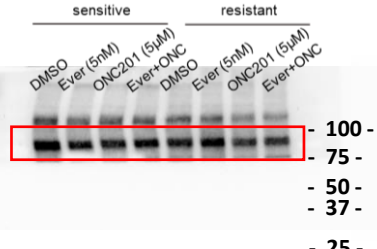

FoxO3a (97 kDa)

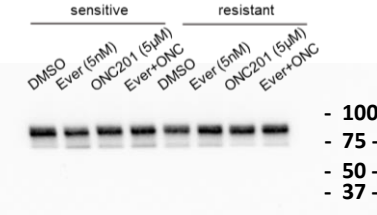

pS6 (32 kDa)

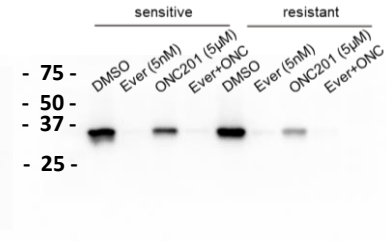

S6 (32 kDa)

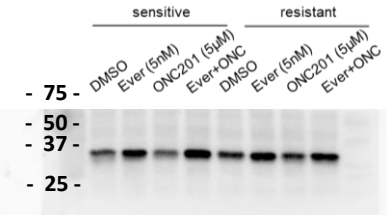

TRAIL (30 kDa)

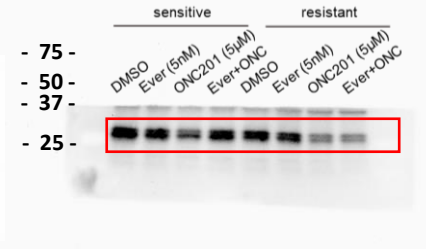

β-actin (43 kDa)

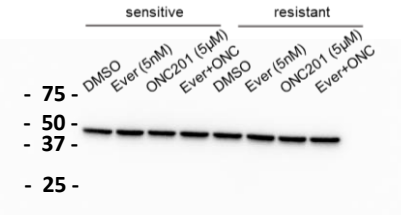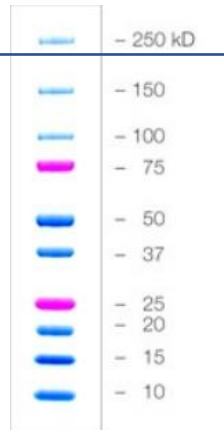

Supplement: fig4-figsupp1-data2 [file elife-85898-fig4-figsupp1-data2-v1.pdf]
